# Supplementary material for: Guest water hinders sodium-ion diffusion in low-defect Berlin green cathode material
Source: Royal Society of Chemistry journal article supplement (doi:10.1039/d2dt02384a), 2022-01-01
Supplement: d2dt02384a1.pdf [file d2dt02384a1.pdf]

## SUPPORTING INFORMATION

### Guest water hinders sodium diffusion in low-defect Berlin green cathode material

Dickson O. Ojwang<sup>‡\*</sup>, Lennart Häggström<sup>‡</sup>, Tore Ericsson<sup>‡</sup>, Ronnie Mogensen<sup>‡</sup>, and William R. Brant<sup>‡\*</sup>

<sup>‡</sup>Department of Chemistry – Ångström Laboratory, Uppsala University, Box 538, SE-751 21 Uppsala, Sweden

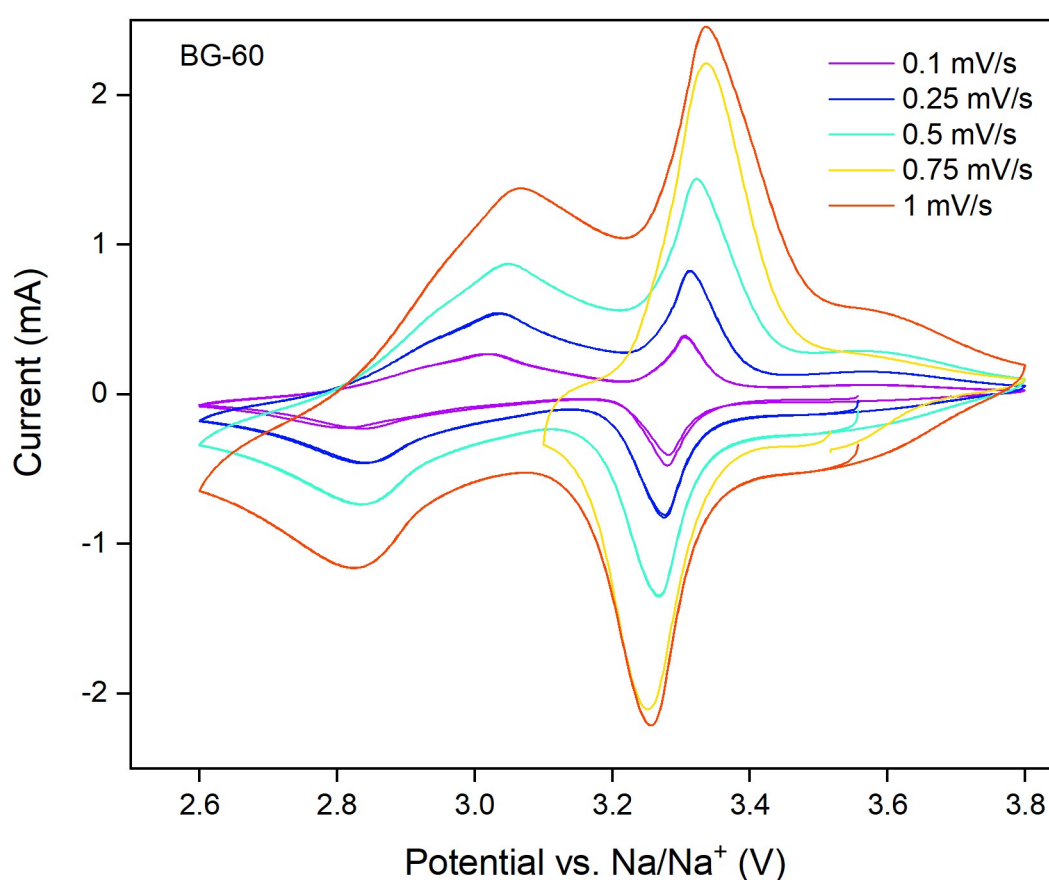

**Figure S1.** Cyclic voltammograms of BG-60 at different scan rates: 0.1, 0.25, 0.5, 0.75, and 1 mV/s in the voltage range of 2.6 – 3.8 V vs. Na/Na<sup>+</sup>. The peaks at higher and lower potentials are assigned to the redox reactions of low-spin Fe<sub>C</sub><sup>3+</sup>/Fe<sub>C</sub><sup>2+</sup> and high-spin Fe<sub>N</sub><sup>3+</sup>/Fe<sub>N</sub><sup>2+</sup> couples, respectively. As demonstrated by the 0.75 mV/s scan rate, the cut-off potential of 3.1 – 3.8 V vs. Na/Na<sup>+</sup> was implemented to only focus on the low-spin Fe<sub>C</sub><sup>3+</sup>/Fe<sub>C</sub><sup>2+</sup> and avoid the characteristic cubic–rhombohedral phase conversion which introduces strain and particle cracking due to the associated volume change.<sup>1,2</sup>

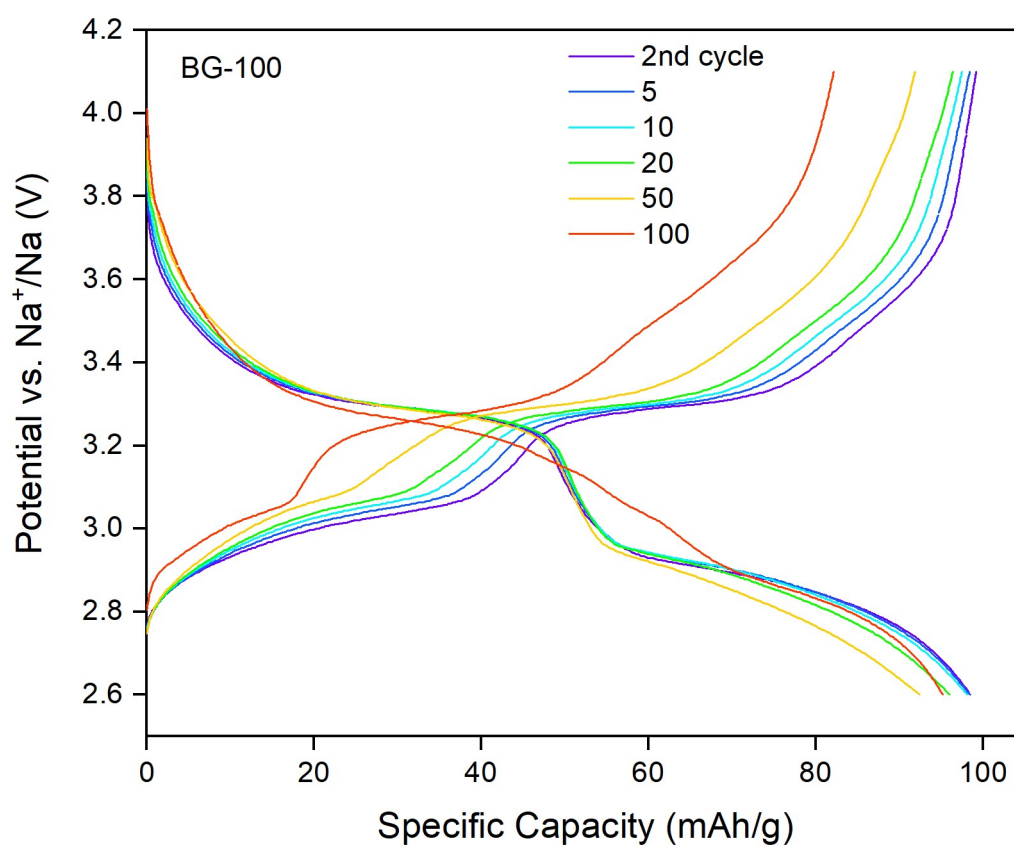

**Figure S2.** Selected charge/discharge profiles of BG-100 electrode/PB full cell at the current rate of 15 mA/g ( $1C = 150 \text{ mA/g}$ ) in potential range of 2.6 – 3.8 V.

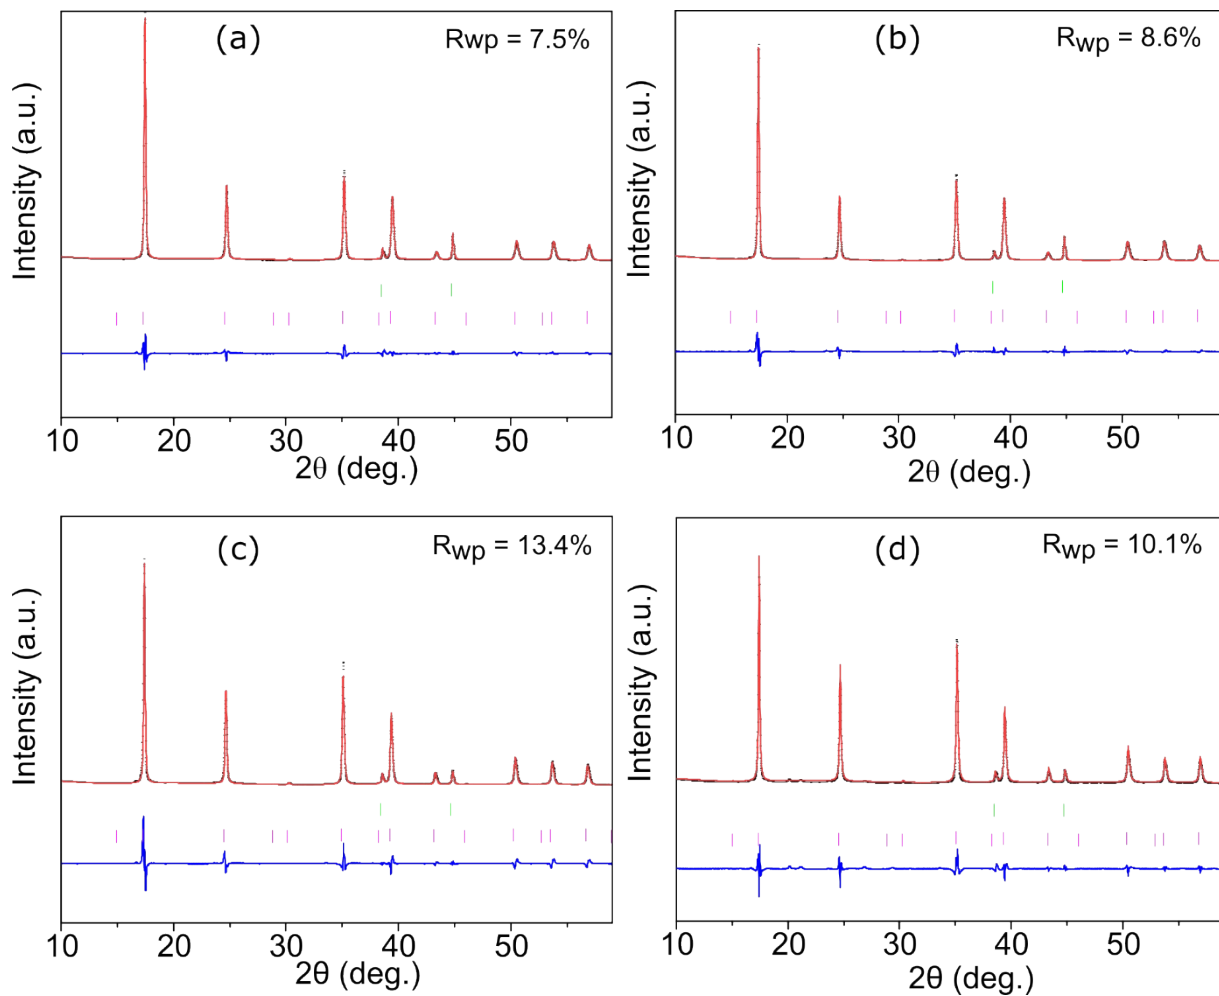

**Figure S3.** Pawley fits<sup>3</sup> of XRD patterns ( $\lambda = 1.5406 \text{ \AA}$ ) of (a) uncycled, (b) mid-charge, (c) charged, and (d) discharged BG-150 electrode. The observed data is plotted in black, simulated pattern for the  $Fm\bar{3}m$  model in red, and difference in blue. Vertical markers show the Bragg positions (BG electrode-pink, and Al-green). The observed Al phase comes from the Al foil used in cell fabrication. The lattice parameters are given in Table S1.

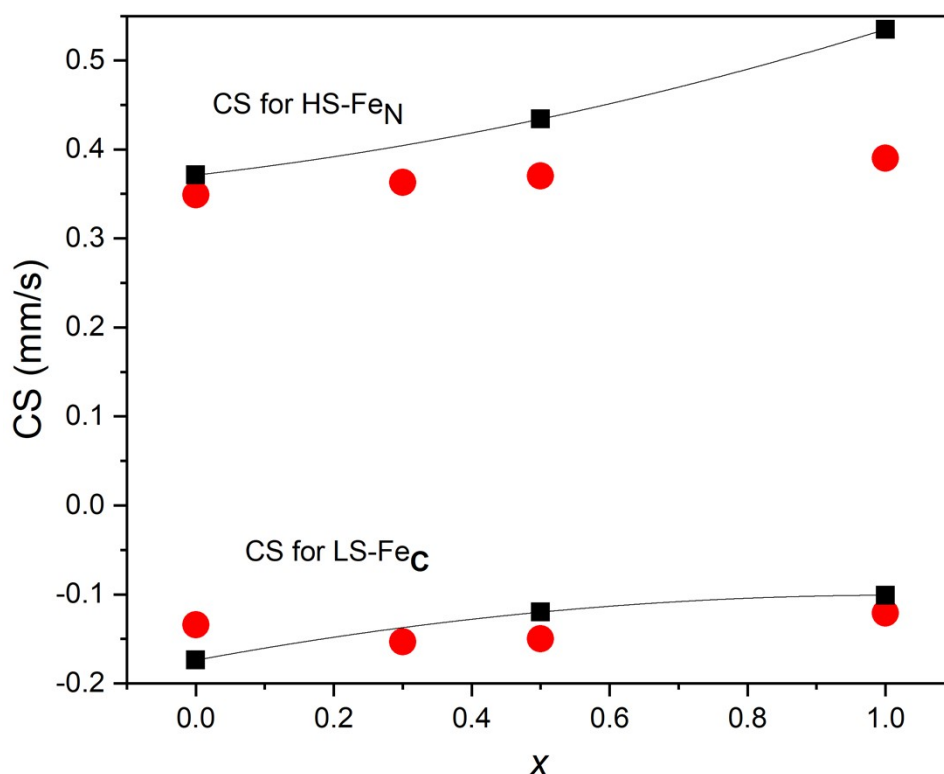

**Figure S4.** Center shift values for BG-150 electrode ( $n = 0.30(5)$ ) as a function of nominal Na content  $x$  (red dots) and from earlier studies of  $\text{Na}_x\text{Fe}[\text{Fe}(\text{CN})_6] \cdot n\text{H}_2\text{O}$ .  $n = 0.54(5)$  for  $x \approx 0$ , and  $1.79(2)$  for  $x \approx 0.5$  and  $1.0$  (black dots).<sup>4</sup> The lines are used as eye guides.

**Table S1.** Pawley fit results for BG-150 electrode (S.G.  $Fm\bar{3}m$ )

| Electrode  | Lattice parameters (Å)  | Volume (Å <sup>3</sup> ) |
|------------|-------------------------|--------------------------|
| Uncycled   | $a = b = c = 10.240(1)$ | 1073.6(1)                |
| Mid-charge | $a = b = c = 10.248(1)$ | 1076.4(1)                |
| Charged    | $a = b = c = 10.266(1)$ | 1081.9(1)                |
| Discharged | $a = b = c = 10.237(1)$ | 1072.9(1)                |

## References

- 1 D. O. Ojwang, M. Svensson, C. Njel, R. Mogensen, A. Sreekumar Menon, T. Ericsson, L. Häggström, J. Maibach and W. Brant, *ACS Appl. Mater. Interfaces*, **13**, 10054–10063.
- 2 W. Brant, R. Mogensen, S. Colbin, D. O. Ojwang, S. Schmid, L. Häggström, T. Ericsson, A. Jaworski, A. Pell and R. Younesi, *Chem. Mater.*, **31**, 7203–7211.
- 3 G. S. Pawley, *J. Appl. Cryst.*, 1981, **14**, 357–361.
- 4 D. O. Ojwang, L. Häggström, T. Ericsson, J. Ångström and W. R. Brant, *Dalt. Trans.*, 2020, **49**, 3570–3579.
